# Supplementary material for: Planning protected areas network that are relevant today and under future climate change is possible: the case of Atlantic Forest endemic birds
Source: PeerJ. 2018 May 24;6:e4689. doi: 10.7717/peerj.4689 (PMC5971100; doi:10.7717/peerj.4689)
Supplement: Table S2 — Raw data for each county in the study, including name, state, area (km2), population size, percentage forest remnants in 2011, percentage area within protected areas, current irreplaceability, future irreplaceability and summary result. [file peerj-06-4689-s004.xlsx]

## Sheet: Title
Table S2: Results per county
Label	Information
County	Name of the county
State	State of the county
County Area (km2)	Area of the county in km2
Population size in 2013	Population size in county in 2013
Forest Remanents in 2011 (%)	Percent forest cover within the county in 2011, according to SOS Mata Atlântica and INPE (2012)
Area (%) within Protected Area	Percentage area of the county within protected area
Current Irreplacebility	Number of times that the county was selected in 100 runs under current conditions
Future Irreplacebility	Number of times that the county was selected in 100 runs under future conditions
Summary Result	Summary of the result: 1 = county always included for having at least 50% of its area within protected areas; 2 = county selected in both current and future proposed protected area network; 3 = county selected only in the current proposed protected area network, 4 = county selected only in the future proposed protected area network
Priority Score	For counties selected in both current and future proposed protected area network: percent forest remanent in 2011 + percent area outside protected areas + irreplacebility under current conditions + irreplacebility under future conditions
Supplementary file from manuscript:
Planning protected areas netwror that are relevant today and under future climate change: the case of Atlantic Forest endemic birds
Mariana M. Vale, Thiago V. Souza, Maria Alice S. Alves4 Renato Crouzeilles

## Sheet: Results
County	State	County Area (km2)	Population size in 2013	Forest Remanents in 2011 (%)	Area (%) within Protected Area	Current Irreplacebility (%)	Future Irreplacebility (%)	Summary Result	Priority Score
Tapiraí	São Paulo	755.2	8125	0.828992	0.0171529	100	100	2	381.184
Guaratuba	Paraná	1325.83	34338	0.812546	0.0982509	100	100	2	371.43
Morretes	Paraná	684.711	16325	0.718938	0.00520062	100	100	2	371.374
Anitápolis	Santa Catarina	542.443	3259	0.676847	0.000276577	100	100	2	367.657
Antonina	Paraná	882.367	19412	0.796786	0.123	100	100	2	367.379
Major Gercino	Santa Catarina	285.599	3375	0.659223	0	100	100	2	365.922
Miracatu	São Paulo	1000.64	20790	0.697861	0.0566788	100	100	2	364.118
José Boiteux	Santa Catarina	405.44	4837	0.638669	9.30158e-05	100	100	2	363.858
Morro Grande	Santa Catarina	256.459	2928	0.627766	0.00621355	100	100	2	362.155
Antônio Carlos	Santa Catarina	228.972	7906	0.616019	0	100	100	2	361.602
Botuverá	Santa Catarina	303.085	4785	0.812711	0.204168	100	100	2	360.854
Juquitiba	São Paulo	521.612	30239	0.646171	0.0577468	100	100	2	358.842
Mirim Doce	Santa Catarina	336.294	2476	0.583135	0	100	100	2	358.313
Angelina	Santa Catarina	499.744	5166	0.578601	0	100	100	2	357.86
Timbé do Sul	Santa Catarina	333.337	5387	0.567362	0	100	100	2	356.736
São Pedro de Alcântara	Santa Catarina	139.664	5139	0.548465	0	100	100	2	354.846
Rio de Janeiro	Rio de Janerio	1176.07	6429922	0.61107	0.0815771	100	100	2	352.949
Guaraqueçaba	Paraná	2018.85	8012	0.801957	0.2765	100	100	2	352.546
Leoberto Leal	Santa Catarina	291.149	3298	0.511906	0	100	100	2	351.191
Rancho Queimado	Santa Catarina	286.57	2827	0.484945	0	100	100	2	348.495
Doutor Pedrinho	Santa Catarina	375.773	3828	0.591193	0.114335	100	100	2	347.686
Águas Mornas	Santa Catarina	326.543	5926	0.698518	0.221778	100	100	2	347.674
Santa Rosa de Lima	Santa Catarina	202.802	2116	0.475893	0	100	100	2	347.589
Itariri	São Paulo	272.844	16441	0.582771	0.111415	100	100	2	347.136
Santa Terezinha	Santa Catarina	716.278	8883	0.466122	2.24172e-05	100	100	2	346.61
Três Forquilhas	Rio Grande do Sul	217.368	2953	0.474876	0	100	99	2	346.488
Apiúna	Santa Catarina	493.59	10099	0.664143	0.203522	100	100	2	346.062
Sete Barras	São Paulo	1052.14	13239	0.702246	0.258608	100	100	2	344.364
Rio dos Cedros	Santa Catarina	555.521	10879	0.517623	0	100	92	2	343.762
Cachoeiras de Macacu	Rio de Janerio	955.739	55632	0.439149	0.00484854	100	100	2	343.43
Rio do Campo	Santa Catarina	506.124	6185	0.431797	0	100	100	2	343.18
São Bonifácio	Santa Catarina	461.241	2989	0.617877	0.188319	100	100	2	342.956
Presidente Nereu	Santa Catarina	224.679	2314	0.626692	0.218061	100	100	2	340.863
Rio Rufino	Santa Catarina	282.6	2482	0.407958	0	100	100	2	340.796
Vitor Meireles	Santa Catarina	371.625	5190	0.421346	0	100	98	2	340.135
Alfredo Wagner	Santa Catarina	732.301	9737	0.394861	0.000594213	100	100	2	339.427
Gameleira	Pernambuco	257.801	29515	0.386626	0	100	100	2	338.663
Cananéia	São Paulo	1242.01	12598	0.814618	0.430625	100	100	2	338.399
Riozinho	Rio Grande do Sul	239.381	4531	0.368184	0	100	100	2	336.818
Monte Castelo	Santa Catarina	561.797	8478	0.360884	0	100	100	2	336.088
Adrianópolis	Paraná	1349.38	6416	0.35955	0.000234727	100	100	2	335.932
Maceió	Alagoas	510.665	996736	0.35732	0	100	100	2	335.732
Siderópolis	Santa Catarina	262.766	13499	0.534458	0.179226	100	100	2	335.523
Itagi	Bahia	303.176	13433	0.354636	0	100	100	2	335.464
Bocaiúva do Sul	Paraná	826.398	11826	0.353915	0.00016698	100	100	2	335.375
Bom Retiro	Santa Catarina	1055.47	9397	0.386907	0.0385114	100	100	2	334.84
Iguape	São Paulo	1981.09	30124	0.737094	0.396657	100	100	2	334.044
Santa Cruz Cabrália	Bahia	1550.9	27854	0.336284	5.18771e-05	100	100	2	333.623
Alfredo Chaves	Espiríto Santo	615.71	14859	0.32995	0.00096483	100	100	2	332.899
Monteiro Lobato	São Paulo	332.629	4381	0.308575	0	100	100	2	330.857
Maquiné	Rio Grande do Sul	622.047	7068	0.371322	0.063626	100	100	2	330.77
Wagner	Bahia	415.663	9504	0.300142	0	100	100	2	330.014
Jaguaripe	Bahia	891.25	18114	0.328963	0	100	97	2	329.896
São José da Coroa Grande	Pernambuco	69.2133	19663	0.29702	0	100	100	2	329.702
Urubici	Santa Catarina	1019.27	11012	0.420893	0.125102	100	100	2	329.579
Paripueira	Alagoas	92.7933	12474	0.293994	0	100	100	2	329.399
Casimiro de Abreu	Rio de Janerio	460.903	38492	0.318491	0.0304269	100	100	2	328.806
Silva Jardim	Rio de Janerio	938.244	21366	0.341094	0.0562442	100	100	2	328.485
Inácio Martins	Paraná	936.961	11282	0.282106	0	100	100	2	328.211
Tunas do Paraná	Paraná	668.46	7127	0.279811	0	100	100	2	327.981
Santa Leopoldina	Espiríto Santo	716.426	12881	0.277421	0.00112587	100	100	2	327.63
Reserva do Iguaçu	Paraná	834.147	7697	0.2905	0.0145796	100	100	2	327.592
Rio Claro	Rio de Janerio	841.48	17709	0.423167	0.139658	99	100	2	327.351
Macaé	Rio de Janerio	1215.09	224442	0.27471	0.00468917	100	100	2	327.002
Matos Costa	Santa Catarina	432.252	2767	0.264834	0	100	100	2	326.483
Barra de Santo Antônio	Alagoas	137.903	15377	0.263883	0	100	100	2	326.388
Petrolândia	Santa Catarina	306.123	6140	0.271195	0	100	99	2	326.12
Teresópolis	Rio de Janerio	770.355	169849	0.342212	0.0832325	100	100	2	325.898
Coronel Domingos Soares	Paraná	1576.27	7525	0.255596	0	100	100	2	325.56
Guapimirim	Rio de Janerio	360.881	54706	0.36789	0.116216	100	100	2	325.167
Dário Meira	Bahia	400.27	12721	0.265367	0.0215242	100	100	2	324.384
Calmon	Santa Catarina	639.523	3416	0.242529	0	100	100	2	324.253
Piedade	São Paulo	745.542	54323	0.258323	0.0197199	100	100	2	323.86
Baía Formosa	Rio Grande do Norte	245.584	9048	0.247452	0	99	100	2	323.745
Rio Largo	Alagoas	309.461	71834	0.226388	0	100	100	2	322.639
Mallet	Paraná	723.118	13475	0.224146	0	100	100	2	322.415
Itati	Rio Grande do Sul	201.384	2625	0.396268	0.175483	100	100	2	322.078
General Carneiro	Paraná	1070.43	14039	0.233067	0.0140003	100	100	2	321.907
Timbó Grande	Santa Catarina	596.988	7495	0.218266	0	100	100	2	321.827
Sirinhaém	Pernambuco	378.886	43036	0.214524	0	100	100	2	321.452
Linhares	Espiríto Santo	3501.37	157814	0.220307	0.011803	100	100	2	320.85
Mata de São João	Bahia	670.594	44538	0.213593	0.00537186	100	100	2	320.822
Nova Pádua	Rio Grande do Sul	103.25	2545	0.236838	0	97	100	2	320.684
Bituruna	Paraná	1214.84	16416	0.206196	0	100	100	2	320.62
Jitaúna	Bahia	332.832	13667	0.204738	0	100	100	2	320.474
Conde	Bahia	950.551	25714	0.204559	0	100	100	2	320.456
Maragogi	Alagoas	333.795	31299	0.202059	0	100	100	2	320.206
Itamaraju	Bahia	2369.87	67128	0.198027	0	100	100	2	319.803
Água Preta	Pernambuco	543.033	34978	0.197814	0	100	100	2	319.781
Nossa Senhora do Socorro	Sergipe	157.439	172547	0.19534	0	100	100	2	319.534
Cruz Machado	Paraná	1478.5	18702	0.193411	0	100	100	2	319.341
Tamandaré	Pernambuco	190.102	22046	0.213948	0.0208521	100	100	2	319.31
São Cristóvão	Sergipe	437.469	84620	0.191705	0	100	100	2	319.171
Rio Formoso	Pernambuco	239.751	22970	0.194373	0.00693047	100	100	2	318.744
Ibiúna	São Paulo	1059.64	75241	0.419869	0.23443	100	100	2	318.544
Passos Maia	Santa Catarina	614.475	4387	0.277858	0.0930096	100	100	2	318.485
Capão Alto	Santa Catarina	1335.36	2711	0.182364	0	100	100	2	318.236
Grão Pará	Santa Catarina	336.047	6418	0.296056	0.11442	100	100	2	318.164
Ipojuca	Pernambuco	527.189	87926	0.177547	0	100	100	2	317.755
Jandaíra	Bahia	642.586	10997	0.174635	0	100	100	2	317.464
Ribeirão	Pernambuco	287.946	46200	0.174387	0	100	100	2	317.439
Passo de Camaragibe	Alagoas	187.154	15372	0.171947	0	100	100	2	317.195
Joaquim Gomes	Alagoas	238.723	23813	0.169223	0	100	100	2	316.922
Lebon Régis	Santa Catarina	940.617	12077	0.165383	0	100	100	2	316.538
Itagibá	Bahia	810.244	15829	0.165094	0	100	100	2	316.509
Cabo de Santo Agostinho	Pernambuco	447.788	196152	0.197994	0.0344652	100	100	2	316.353
Belmonte	Bahia	2009.89	23471	0.164754	0.00194969	100	100	2	316.28
Rio Bonito	Rio de Janerio	462.244	56942	0.16337	0.00067771	100	100	2	316.269
Iguaí	Bahia	833.012	27615	0.15913	0.0001926	100	100	2	315.894
Ponte Alta	Santa Catarina	566.608	4885	0.15767	0	100	100	2	315.767
São Joaquim	Santa Catarina	1885.69	25841	0.156752	0	100	100	2	315.675
Caatiba	Bahia	655.625	10828	0.156214	0	100	100	2	315.621
São Lourenço da Mata	Pernambuco	264.253	108301	0.159212	0.0036219	100	100	2	315.559
Porto de Pedras	Alagoas	266.213	8362	0.147201	0	100	100	2	314.72
Pilar	Alagoas	248.931	35003	0.14401	0	100	100	2	314.401
Divina Pastora	Sergipe	92.2798	4715	0.141114	0	100	100	2	314.111
Esplanada	Bahia	1370.83	35930	0.140351	0	100	100	2	314.035
Bocaina do Sul	Santa Catarina	513.132	3393	0.139442	0	100	100	2	313.944
Bananal	São Paulo	616.217	10680	0.343625	0.0145097	81	100	2	313.912
Nova Redenção	Bahia	510.93	8527	0.13772	0	100	100	2	313.772
Bandeira	Minas Gerais	484.888	5059	0.137693	0	100	100	2	313.769
São José dos Ausentes	Rio Grande do Sul	1176.76	3441	0.136919	2.807e-08	100	100	2	313.692
Jequiá da Praia	Alagoas	338.356	11969	0.135517	0	100	100	2	313.552
Coruripe	Alagoas	912.937	55648	0.135511	0	100	100	2	313.551
Messias	Alagoas	112.86	17110	0.140212	0.00500488	100	100	2	313.521
Itororó	Bahia	330.765	21106	0.134167	0	100	100	2	313.417
Barreiros	Pernambuco	233.388	41987	0.132192	0	100	100	2	313.219
Siriri	Sergipe	168.997	8496	0.131776	0	100	100	2	313.178
Saquarema	Rio de Janerio	354.72	79421	0.206148	0.0748035	100	100	2	313.134
Resende	Rio de Janerio	1113.49	123385	0.23551	0.10422	100	100	2	313.129
Matriz de Camaragibe	Alagoas	330.042	25005	0.131101	0	100	100	2	313.11
Água Doce	Santa Catarina	1312.93	7110	0.129037	0	100	100	2	312.904
Bom Jesus	Rio Grande do Sul	2625.54	11823	0.129491	0.000485456	100	100	2	312.901
Ubaíra	Bahia	762.375	21897	0.127746	0	100	100	2	312.775
Ponte Serrada	Santa Catarina	563.916	11358	0.272485	0.125803	100	98	2	312.668
Urupema	Santa Catarina	353.171	2507	0.126174	0	100	100	2	312.617
Doutor Ulysses	Paraná	781.249	5837	0.123577	0	100	100	2	312.358
Almenara	Minas Gerais	2300.68	40749	0.136385	0.00315101	100	99	2	312.323
Jiquiriçá	Bahia	236.091	14936	0.123073	0	100	100	2	312.307
Lajedinho	Bahia	807.014	4079	0.122595	0	100	100	2	312.26
Jucuruçu	Bahia	1438.26	10403	0.122493	0	100	100	2	312.249
Porto Seguro	Bahia	2408.57	141006	0.29906	0.176748	100	100	2	312.231
Pavão	Minas Gerais	599.417	8771	0.122172	0	100	100	2	312.217
São Francisco de Paula	Rio Grande do Sul	3273.58	21408	0.135847	0.0136977	100	100	2	312.215
Malhador	Sergipe	100.986	12501	0.123957	0.00235019	100	100	2	312.161
Chã Preta	Alagoas	200.875	7413	0.174461	0.00289775	95	100	2	312.156
Itaporanga D'Ajuda	Sergipe	757.296	32496	0.125014	0.00386862	100	100	2	312.115
Japaratuba	Sergipe	359.484	17903	0.117776	0	100	100	2	311.778
Campina do Simão	Paraná	449.34	4130	0.116044	0	100	100	2	311.604
São Luís do Quitunde	Alagoas	404.041	34239	0.113724	0	100	100	2	311.372
São Miguel dos Campos	Alagoas	360.811	59077	0.11296	0	100	100	2	311.296
Japaratinga	Alagoas	85.4526	8234	0.112603	0	100	100	2	311.26
Candói	Paraná	1512.76	15657	0.109863	0	100	100	2	310.986
Jaguaquara	Bahia	960.161	54902	0.108139	0	100	100	2	310.814
Rosário do Catete	Sergipe	105.337	10013	0.107553	0	100	100	2	310.755
Riachuelo	Sergipe	78.4545	9863	0.104016	0	100	100	2	310.402
Alcobaça	Bahia	1505.95	23176	0.103994	0	100	100	2	310.399
Maruim	Sergipe	94.2742	16998	0.103459	0	100	100	2	310.346
Entre Rios	Bahia	1235.84	42640	0.103435	0	100	100	2	310.344
Santa Luzia do Itanhy	Sergipe	329.474	14564	0.281374	0	99	83	2	310.137
Ponte Alta do Norte	Santa Catarina	400.978	3381	0.0984007	0	100	100	2	309.84
Painel	Santa Catarina	739.845	2385	0.0983066	0	100	100	2	309.831
Escada	Pernambuco	347.457	66419	0.0997081	0.00140264	100	100	2	309.831
Itambé	Bahia	1625.67	23723	0.0965218	0	100	100	2	309.652
Itapebi	Bahia	972.021	10942	0.0956533	0	100	100	2	309.565
Fronteira dos Vales	Minas Gerais	317.763	4777	0.125621	0	97	100	2	309.562
Potiraguá	Bahia	989.358	9574	0.0953643	0	100	100	2	309.536
Itaju do Colônia	Bahia	1217.78	7507	0.0940621	0	100	100	2	309.406
Pau Brasil	Bahia	608.908	11166	0.0933965	0	100	100	2	309.34
Moreno	Pernambuco	195.546	59836	0.134605	0.0414273	100	100	2	309.318
Porto Calvo	Alagoas	260.073	27047	0.0913275	0	100	100	2	309.133
Wenceslau Guimarães	Bahia	661.688	23046	0.125153	0.0365639	100	100	2	308.859
Nova Canaã	Bahia	757.571	17013	0.0881763	0	100	100	2	308.818
Barra do Choça	Bahia	778.458	35567	0.0834532	2.6338e-05	100	100	2	308.343
Itarantim	Bahia	1783.63	19837	0.0828685	0	100	100	2	308.287
Murici	Alagoas	423.882	28158	0.171495	0.0892201	100	100	2	308.227
Crisólita	Minas Gerais	969.738	6408	0.0818701	0	100	100	2	308.187
Jacinto	Minas Gerais	1390.49	12511	0.0807234	0	100	100	2	308.072
Flexeiras	Alagoas	315.787	12862	0.152296	0.0726151	100	100	2	307.968
Natividade da Serra	São Paulo	832.521	6821	0.181167	0.102388	100	100	2	307.878
Laranjeiras	Sergipe	162.547	28533	0.0909248	0.012943	100	100	2	307.798
Itanagra	Bahia	452.394	8023	0.0766963	0	100	100	2	307.67
Camacan	Bahia	632.909	33068	0.0763307	0	100	100	2	307.633
Jaquirana	Rio Grande do Sul	907.882	4199	0.127142	0.0512061	100	100	2	307.594
Itueta	Minas Gerais	454.961	6051	0.0822902	0.00726434	100	100	2	307.503
Boca da Mata	Alagoas	186.604	27074	0.0732237	0	100	100	2	307.322
Itabela	Bahia	853.329	30636	0.202302	0	87	100	2	307.23
Cravolândia	Bahia	159.689	5341	0.0712865	0	100	100	2	307.129
Itiruçu	Bahia	302.959	13267	0.0711696	0	100	100	2	307.117
Santa Rita do Itueto	Minas Gerais	486.478	5782	0.162607	0.07145	100	98	2	307.116
Planalto	Bahia	722.965	26225	0.070333	0	100	100	2	307.033
Jacuípe	Alagoas	216.833	7193	0.069404	0	100	100	2	306.94
Umburatiba	Minas Gerais	404.861	2746	0.0686244	0	100	100	2	306.862
Carlos Chagas	Minas Gerais	3199.1	20214	0.0684414	0	100	100	2	306.844
Quissamã	Rio de Janerio	715.725	21806	0.193561	0.128867	100	100	2	306.469
Vereda	Bahia	828.664	6781	0.0629458	0	100	100	2	306.295
Guaratinga	Bahia	2324.54	22583	0.145081	0.0827822	100	100	2	306.23
Capela	Alagoas	205.444	17266	0.0613219	0	100	100	2	306.132
Rubim	Minas Gerais	968.674	10278	0.0594451	0	100	100	2	305.945
Conceição da Barra	Espiríto Santo	1188.17	30659	0.110331	0.0120746	100	96	2	305.826
Bom Jardim da Serra	Santa Catarina	935.163	4566	0.253758	0.200911	100	100	2	305.285
Macarani	Bahia	1371.5	18419	0.0612359	0	99	100	2	305.124
Ataléia	Minas Gerais	1838.41	14344	0.0460073	0	100	100	2	304.601
Atalaia	Alagoas	531.845	46787	0.0424679	0	100	100	2	304.247
Salto da Divisa	Minas Gerais	943.688	7084	0.0765552	0.0405946	100	100	2	303.596
Caravelas	Bahia	2361.46	22328	0.105852	0	100	93	2	303.585
Araças	Bahia	464.603	12351	0.0335221	0	100	100	2	303.352
Santa Cecília	Santa Catarina	1145.3	16315	0.131619	0	90	100	2	303.162
Nilo Peçanha	Bahia	385.336	13555	0.361519	0	67	100	2	303.152
Cambará do Sul	Rio Grande do Sul	1212.52	6712	0.180385	0.149784	100	100	2	303.06
Jordânia	Minas Gerais	549.055	10744	0.0973389	0	93	100	2	302.734
Sooretama	Espiríto Santo	593.379	26843	0.42029	0.393568	100	100	2	302.672
Itaguaçu	Espiríto Santo	530.254	14844	0.106669	0	93	99	2	302.667
Nossa Senhora das Dores	Sergipe	470.877	25839	0.0786636	0	96	98	2	301.866
Águas Formosas	Minas Gerais	817.778	19186	0.10491	0	91	100	2	301.491
Derrubadas	Rio Grande do Sul	361.333	3199	0.47776	0.463234	100	100	2	301.453
Novo Oriente de Minas	Minas Gerais	754.082	10738	0.203666	0	87	94	2	301.367
Caraá	Rio Grande do Sul	294.341	7742	0.238517	0	77	100	2	300.852
Indiaroba	Sergipe	313.596	16940	0.205352	0	84	96	2	300.535
Itagimirim	Bahia	817.186	7420	0.0507581	1.61557e-06	94	100	2	299.076
Rio Tinto	Paraíba	466.616	23883	0.194813	0.00785314	83	97	2	298.696
Lençóis	Bahia	1240.27	11300	0.166854	0.19023	100	100	2	297.662
Bertópolis	Minas Gerais	425.677	4648	0.0397912	0	93	100	2	296.979
Andaraí	Bahia	1894.89	14738	0.164375	0.197378	100	100	2	296.7
São Cristovão do Sul	Santa Catarina	349.092	5255	0.135517	0	80	100	2	293.552
Arapeí	São Paulo	155.703	2541	0.20469	0	63	100	2	283.469
Ipê	Rio Grande do Sul	600.02	6334	0.0930034	0	74	100	2	283.3
Macieira	Santa Catarina	260.211	1831	0.21264	0	100	60	2	281.264
Turvo	Paraná	902.316	13937	0.212156	0	100	48	2	269.216
Jaguaré	Espiríto Santo	656.611	27599	0.119142	0.00903962	56	100	2	267.01
Resplendor	Minas Gerais	1072.21	17631	0.0595305	0.0414326	84	81	2	266.81
Boa Ventura de São Roque	Paraná	622.235	6702	0.0836053	0	100	54	2	262.361
Aimorés	Minas Gerais	1350	25675	0.0724755	0	100	51	2	258.248
Marilândia	Espiríto Santo	309.547	12092	0.109955	0	59	84	2	253.995
Prado	Bahia	1664.64	29095	0.256685	0.157592	44	100	2	253.909
Campestre da Serra	Rio Grande do Sul	537.922	3375	0.136603	0	100	30	2	243.66
Pinhão	Paraná	2001.66	31617	0.137442	0	24	100	2	237.744
Prudentópolis	Paraná	2308	50983	0.183528	0	85	30	2	233.353
Japoatã	Sergipe	420.581	13253	0.0922827	0	65	53	2	227.228
Presidente Kennedy	Espiríto Santo	586.417	11130	0.0561834	0.001287	32	65	2	202.49
Angra dos Reis	Rio de Janerio	800.598	181486	0.813152	0.564212	100	100	1	NA
Barra do Turvo	São Paulo	1007.33	7878	0.535553	0.620548	100	100	1	NA
Bertioga	São Paulo	491.469	53679	0.830481	0.671492	100	100	1	NA
Caraguatatuba	São Paulo	482.843	109678	0.802867	0.675423	100	100	1	NA
Céu Azul	Paraná	1179.39	11528	0.727064	0.722985	100	100	1	NA
Ilhabela	São Paulo	337.895	30983	0.444303	0.835559	100	100	1	NA
Iporanga	São Paulo	1160.12	4369	0.818063	0.496134	100	100	1	NA
Marliéria	Minas Gerais	546.204	4125	0.577053	0.550653	100	100	1	NA
Parati	Rio de Janerio	920.483	39434	0.787137	0.527439	100	100	1	NA
Paulo Lopes	Santa Catarina	450.419	7045	0.691904	0.547369	100	100	1	NA
Pedro de Toledo	São Paulo	671.005	10791	0.84341	0.699107	100	100	1	NA
Santo Amaro da Imperatriz	Santa Catarina	344.975	21221	0.690972	0.565762	100	100	1	NA
São Sebastião	São Paulo	399.559	80379	0.909677	0.687449	100	100	1	NA
Serranópolis do Iguaçu	Paraná	483.586	4667	0.606	0.635822	100	100	1	NA
Ubatuba	São Paulo	700.894	84377	0.653646	0.723633	100	100	1	NA
Rio Bom	Paraná	177.743	3385	0.0629911	0	11	0	3	NA
Itapoá	Santa Catarina	257.508	16899	0.619585	0.00108626	18	0	3	NA
Rio Manso	Minas Gerais	232.172	5585	0.132004	0	21	0	3	NA
Paulistas	Minas Gerais	220.01	5020	0.140878	0	35	0	3	NA
Santo Antônio do Aventureiro	Minas Gerais	201.853	3650	0.112505	0	37	0	3	NA
Frei Lagonegro	Minas Gerais	168.791	3462	0.124711	0	39	0	3	NA
Dores do Turvo	Minas Gerais	231.348	4516	0.121366	0	40	0	3	NA
Brás Pires	Minas Gerais	223.446	4664	0.137796	0	52	0	3	NA
Bias Fortes	Minas Gerais	284.048	3765	0.133295	0	55	0	3	NA
Descoberto	Minas Gerais	213.31	4968	0.164146	0	61	0	3	NA
Bom Sucesso	Paraná	322.843	6866	0.130977	0	66	0	3	NA
Ivaí	Paraná	607.734	13451	0.119281	0	71	0	3	NA
Abelardo Luz	Santa Catarina	955.269	17584	0.166923	0.0686312	72	0	3	NA
Caranaíba	Minas Gerais	160.047	3341	0.197484	0	77	0	3	NA
Estrela Velha	Rio Grande do Sul	281.723	3741	0.118504	0	77	0	3	NA
Capão Bonito	São Paulo	1640.87	47510	0.240884	0.177736	80	0	3	NA
Irineópolis	Santa Catarina	591.222	10843	0.168146	0	83	0	3	NA
Piau	Minas Gerais	191.381	2887	0.118545	0	83	0	3	NA
Santana dos Montes	Minas Gerais	196.497	3908	0.178375	0	84	0	3	NA
Nova Palma	Rio Grande do Sul	313.485	6569	0.189806	0.00492143	86	0	3	NA
Itaverava	Minas Gerais	282.541	5833	0.242494	0	87	0	3	NA
Santa Maria de Itabira	Minas Gerais	597.725	10918	0.165633	0.000481159	89	0	3	NA
Belmiro Braga	Minas Gerais	392.472	3499	0.169429	0	90	0	3	NA
Pinhal Grande	Rio Grande do Sul	477.163	4577	0.0920512	0.00568936	91	0	3	NA
São João do Triunfo	Paraná	720.288	14462	0.189063	0	91	0	3	NA
Alvinlândia	São Paulo	84.9908	3137	0.174986	0.0545248	94	0	3	NA
Linha Nova	Rio Grande do Sul	63.6875	1692	0.25818	0	94	0	3	NA
Passa-Vinte	Minas Gerais	245.575	2121	0.327726	0	94	0	3	NA
Pontão	Rio Grande do Sul	505.69	3982	0.0749334	0	94	0	3	NA
Queluzito	Minas Gerais	152.988	1934	0.140692	0	94	0	3	NA
Tijucas do Sul	Paraná	672.324	15575	0.220356	0	94	0	3	NA
Vespasiano Correa	Rio Grande do Sul	113.868	1997	0.175189	0	95	0	3	NA
Morrinhos do Sul	Rio Grande do Sul	165.438	3225	0.183113	0	96	0	3	NA
Honório Serpa	Paraná	502.162	5902	0.115892	0	97	0	3	NA
Gramado dos Loureiros	Rio Grande do Sul	131.38	2295	0.170387	0	97	0	3	NA
Ingaí	Minas Gerais	305.007	2740	0.0858146	0	97	0	3	NA
Braúnas	Minas Gerais	377.069	5091	0.164894	0	98	0	3	NA
Ferros	Minas Gerais	1090.11	10807	0.16202	0	98	0	3	NA
Cotiporã	Rio Grande do Sul	172.396	4019	0.245193	0	98	0	3	NA
São Domingos do Norte	Espiríto Santo	299.378	8595	0.0331084	0	99	0	3	NA
Chiapetta	Rio Grande do Sul	396.52	4100	0.102153	0	99	0	3	NA
Coronel Pilar	Rio Grande do Sul	105.258	1754	0.171706	0	99	0	3	NA
Paraíso do Sul	Rio Grande do Sul	342.463	7615	0.237609	0	99	0	3	NA
Açucena	Minas Gerais	811.704	10297	0.0868433	0.0636809	100	0	3	NA
Afonso Cláudio	Espiríto Santo	954.648	32551	0.09062	0.00230598	100	0	3	NA
Aracruz	Espiríto Santo	1436.22	91562	0.0903415	0.00288444	100	0	3	NA
Arataca	Bahia	396.043	11822	0.0943702	0.18034	100	0	3	NA
Baixo Guandu	Espiríto Santo	917.813	31126	0.0615065	0	100	0	3	NA
Bela Vista do Toldo	Santa Catarina	534.707	6191	0.243935	0	100	0	3	NA
Belo Oriente	Minas Gerais	335.881	25026	0.0592931	0	100	0	3	NA
Benedito Novo	Santa Catarina	388.166	10906	0.456145	0.0304861	100	0	3	NA
Boa Esperança	Espiríto Santo	428.68	15169	0.0441341	0	100	0	3	NA
Boa Nova	Bahia	856.908	15141	0.115918	0.295757	100	0	3	NA
Bom Jesus do Galho	Minas Gerais	590.767	15633	0.0674986	4.24547e-05	100	0	3	NA
Bonito	Bahia	641.221	16132	0.28144	0	100	0	3	NA
Bugre	Minas Gerais	162.118	4122	0.0596804	0	100	0	3	NA
Camaragibe	Pernambuco	55.1921	151587	0.46709	0	100	0	3	NA
Cândido de Abreu	Paraná	1510.38	16633	0.126683	0	100	0	3	NA
Caratinga	Minas Gerais	1251.27	89578	0.0918996	0	100	0	3	NA
Carmópolis	Sergipe	45.9248	14937	0.102708	0	100	0	3	NA
Conselheiro Pena	Minas Gerais	1481.46	23032	0.0474076	0.0345685	100	0	3	NA
Cruzmaltina	Paraná	312.123	3185	0.0731439	0	100	0	3	NA
Dona Emma	Santa Catarina	180.815	3912	0.252852	0	100	0	3	NA
Eldorado	São Paulo	1656.82	15238	0.713257	0.190242	100	0	3	NA
Entre Rios	Santa Catarina	105.15	3118	0.350484	0	100	0	3	NA
Faxinal	Paraná	716.14	17006	0.133701	0	100	0	3	NA
Fernandes Pinheiro	Paraná	406.399	6008	0.1797	0.0127492	100	0	3	NA
Fundão	Espiríto Santo	279.5	19177	0.0814739	0	100	0	3	NA
Gália	São Paulo	355.83	7019	0.148151	0.050331	100	0	3	NA
Garuva	Santa Catarina	501.178	16081	0.602952	0	100	0	3	NA
General Maynard	Sergipe	20.2575	3143	0.121101	0	100	0	3	NA
Gravatá	Pernambuco	513.305	80450	0.315469	0	100	0	3	NA
Iapu	Minas Gerais	337.599	10768	0.0539452	0	100	0	3	NA
Ibicaraí	Bahia	217.854	24595	0.0281429	0	100	0	3	NA
Ilhéus	Bahia	1841.25	184616	0.204559	0.0188647	100	0	3	NA
Imaruí	Santa Catarina	542.171	11301	0.300627	0.140188	100	0	3	NA
Ipaba	Minas Gerais	114.381	17729	0.108258	0	100	0	3	NA
Ipatinga	Minas Gerais	165.614	253098	0.231061	0.000103104	100	0	3	NA
Itabuna	Bahia	443.446	218124	0.0325143	0	100	0	3	NA
Itaiópolis	Santa Catarina	1295.21	21015	0.341686	0.00265602	100	0	3	NA
Jaboatão dos Guararapes	Pernambuco	256.204	675599	0.363685	0.0197455	100	0	3	NA
Jacupiranga	São Paulo	708.503	17801	0.465328	0.145874	100	0	3	NA
Jussari	Bahia	356.671	6493	0.0455297	0	100	0	3	NA
Laranja da Terra	Espiríto Santo	457.039	11418	0.0991073	0	100	0	3	NA
Luiziana	Paraná	908.59	7487	0.138522	0	100	0	3	NA
Lupércio	São Paulo	155.116	4523	0.158176	0	100	0	3	NA
Major Vieira	Santa Catarina	525.82	7782	0.180089	0	100	0	3	NA
Mampituba	Rio Grande do Sul	157.875	3087	0.30259	4.22865e-05	100	0	3	NA
Materlândia	Minas Gerais	282.404	4673	0.227173	0	100	0	3	NA
Miguel Calmon	Bahia	1582.28	27569	0.138622	0.0178341	100	0	3	NA
Mutum	Minas Gerais	1255.58	27456	0.0783365	0	100	0	3	NA
Naque	Minas Gerais	129.247	6708	0.0240745	0	100	0	3	NA
Nova Trento	Santa Catarina	402.139	13135	0.739162	0	100	0	3	NA
Nova Venécia	Espiríto Santo	1448.05	49564	0.0407656	3.44664e-05	100	0	3	NA
Ortigueira	Paraná	2429.8	23646	0.13288	0	100	0	3	NA
Papanduva	Santa Catarina	759.847	18568	0.264155	0	100	0	3	NA
Paula Freitas	Paraná	420.353	5700	0.185795	0	100	0	3	NA
Paulista	Pernambuco	93.3886	316714	0.594223	0	100	0	3	NA
Periquito	Minas Gerais	227.782	7150	0.0316901	0	100	0	3	NA
Recife	Pernambuco	217.471	1599514	0.738499	0.0106572	100	0	3	NA
Ribeirão Grande	São Paulo	332.054	7667	0.459027	0.0935021	100	0	3	NA
Rio Branco do Ivaí	Paraná	385.753	4056	0.0861298	0	100	0	3	NA
Rio das Ostras	Rio de Janerio	230.655	122196	0.269428	0.0640643	100	0	3	NA
Rio Vermelho	Minas Gerais	987.43	13755	0.239101	0	100	0	3	NA
Roncador	Paraná	742.242	11365	0.133615	0	100	0	3	NA
Sairé	Pernambuco	195.478	10835	0.134678	0	100	0	3	NA
Santana do Paraíso	Minas Gerais	275.46	30255	0.0466484	0	100	0	3	NA
São Gabriel da Palha	Espiríto Santo	432.88	35232	0.0648411	0	100	0	3	NA
São Jerônimo da Serra	Paraná	823.691	11588	0.124532	0	100	0	3	NA
São Mateus	Espiríto Santo	2343.39	120725	0.0671329	0	100	0	3	NA
Sapopema	Paraná	677.559	6912	0.113596	0	100	0	3	NA
Serra	Espiríto Santo	553.123	467318	0.214929	0.000456162	100	0	3	NA
Sobrália	Minas Gerais	206.94	5897	0.0420668	0	100	0	3	NA
Taió	Santa Catarina	692.962	17856	0.369847	0	100	0	3	NA
Tamarana	Paraná	471.979	13298	0.201201	0	100	0	3	NA
Teixeira Soares	Paraná	902.726	11140	0.203076	0.103981	100	0	3	NA
Tibagi	Paraná	2951.45	20184	0.109177	0	100	0	3	NA
Timóteo	Minas Gerais	145.228	86014	0.52284	0.350117	100	0	3	NA
Una	Bahia	1159.36	22989	0.369844	0.380877	100	0	3	NA
Utinga	Bahia	717.522	19516	0.13281	0	100	0	3	NA
Vargem Bonita	Santa Catarina	298.595	4752	0.203969	0	100	0	3	NA
Vidal Ramos	Santa Catarina	339.196	6377	0.467732	0.0509504	100	0	3	NA
Vila Valério	Espiríto Santo	464.416	14614	0.0531032	0.004924	100	0	3	NA
Almirante Tamandaré do Sul	Rio Grande do Sul	265.428	2106	0.0983681	0	100	0	3	NA
Altamira do Paraná	Paraná	388.736	3754	0.0675998	0	100	0	3	NA
André da Rocha	Rio Grande do Sul	329.716	1278	0.069322	0	100	0	3	NA
Aral Moreira	Mato Grosso do Sul	1655.96	11014	0.102226	0	100	0	3	NA
Campo Belo do Sul	Santa Catarina	1027.39	7419	0.118517	0	100	0	3	NA
Campo Bonito	Paraná	433.808	4361	0.132968	0	100	0	3	NA
Catas Altas da Noruega	Minas Gerais	143.319	3608	0.331131	0	100	0	3	NA
Celso Ramos	Santa Catarina	207.602	2792	0.156735	0	100	0	3	NA
Cerro Branco	Rio Grande do Sul	154.104	4639	0.314912	0	100	0	3	NA
Cerro Negro	Santa Catarina	416.708	3472	0.0977309	0	100	0	3	NA
Chiador	Minas Gerais	252.376	2827	0.108192	0	100	0	3	NA
Coqueiro Baixo	Rio Grande do Sul	112.229	1567	0.158986	0	100	0	3	NA
Coqueiros do Sul	Rio Grande do Sul	275.555	2497	0.109007	0	100	0	3	NA
Corupá	Santa Catarina	404.961	14716	0.501937	0	100	0	3	NA
Coxilha	Rio Grande do Sul	422.783	2895	0.0701329	0	100	0	3	NA
Dois Irmãos das MissõEs	Rio Grande do Sul	225.674	2192	0.127593	0	100	0	3	NA
Doutor Ricardo	Rio Grande do Sul	108.425	2082	0.202932	0	100	0	3	NA
Erval Seco	Rio Grande do Sul	363.886	7899	0.242856	0	100	0	3	NA
Esmeralda	Rio Grande do Sul	833.419	3287	0.0573772	0	100	0	3	NA
Espigão Alto do Iguaçu	Paraná	326.467	4642	0.217077	0	100	0	3	NA
Iguatemi	Mato Grosso do Sul	2946.84	15429	0.102399	0	100	0	3	NA
Itapuca	Rio Grande do Sul	184.214	2358	0.134286	0	100	0	3	NA
Ivorá	Rio Grande do Sul	122.893	2166	0.220379	0	100	0	3	NA
Juti	Mato Grosso do Sul	1584.59	6241	0.0695427	0	100	0	3	NA
Laguna Carapã	Mato Grosso do Sul	1733.95	6851	0.100012	0	100	0	3	NA
Muitos CapõEs	Rio Grande do Sul	1193.1	3116	0.0264457	0.00232148	100	0	3	NA
Nonoai	Rio Grande do Sul	469.254	12348	0.291511	0	100	0	3	NA
Nova Cantu	Paraná	555.563	7023	0.102007	0	100	0	3	NA
Nova Laranjeiras	Paraná	1145.5	12010	0.125056	0	100	0	3	NA
Nova Roma do Sul	Rio Grande do Sul	149.066	3520	0.256147	0	100	0	3	NA
Passa Sete	Rio Grande do Sul	304.808	5421	0.225809	0	100	0	3	NA
Pedras Grandes	Santa Catarina	171.734	4110	0.330402	0	100	0	3	NA
Pedro Teixeira	Minas Gerais	113.355	1838	0.184857	0	100	0	3	NA
Pinhal da Serra	Rio Grande do Sul	433.93	2151	0.0814498	0	100	0	3	NA
Pouso Novo	Rio Grande do Sul	106.524	1878	0.195584	0	100	0	3	NA
Protásio Alves	Rio Grande do Sul	172.786	2048	0.2054	0	100	0	3	NA
Quatro Irmãos	Rio Grande do Sul	267.938	1842	0.0761818	0	100	0	3	NA
Relvado	Rio Grande do Sul	123.483	2205	0.211663	0	100	0	3	NA
Santa Bárbara do Monte Verde	Minas Gerais	416.216	2972	0.225464	0	100	0	3	NA
Santa Tereza	Rio Grande do Sul	72.3964	1782	0.328539	0	100	0	3	NA
Santana do Deserto	Minas Gerais	182.228	3997	0.207564	0	100	0	3	NA
Silveira Martins	Rio Grande do Sul	118.32	2495	0.313007	0	100	0	3	NA
Simão Pereira	Minas Gerais	134.762	2628	0.16054	0	100	0	3	NA
Sinimbu	Rio Grande do Sul	510.076	10390	0.315574	0	100	0	3	NA
Tacuru	Mato Grosso do Sul	1785.15	16543	0.0992809	0	100	0	3	NA
Timburi	São Paulo	197.179	2709	0.188376	0	100	0	3	NA
Tuneiras do Oeste	Paraná	698.683	8887	0.154397	0.0988265	100	0	3	NA
União da Serra	Rio Grande do Sul	130.996	1457	0.160259	0	100	0	3	NA
Vargem	Santa Catarina	349.955	2718	0.104076	0	100	0	3	NA
Vila Alta	Paraná	967.699	3159	0.0458317	0.266981	100	0	3	NA
Vista Alegre do Prata	Rio Grande do Sul	119.327	1614	0.186283	0	100	0	3	NA
Galiléia	Minas Gerais	721.271	7092	0.0290317	0	0	46	4	NA
Marquinho	Paraná	511.146	4965	0.0457325	0	0	50	4	NA
Carapebus	Rio de Janerio	305.451	14408	0.219323	0.174383	0	60	4	NA
Gracho Cardoso	Sergipe	242.232	5824	0.0553943	0	0	63	4	NA
Jequitinhonha	Minas Gerais	3517.74	25150	0.248389	0.142555	0	73	4	NA
Mostardas	Rio Grande do Sul	1983.31	12637	0.00513534	0.0651492	0	78	4	NA
Jampruca	Minas Gerais	520.867	5303	0.0368562	0	0	85	4	NA
Pedralva	Minas Gerais	217.41	11683	0.0627955	0	0	86	4	NA
Pedra Azul	Minas Gerais	1618.52	24612	0.24944	0	0	89	4	NA
Alto Caparaó	Minas Gerais	104.485	5605	0.247709	0.429248	0	100	4	NA
Alto Feliz	Rio Grande do Sul	79.1912	3035	0.238572	0	0	100	4	NA
Alto Jequitibá	Minas Gerais	152.869	8535	0.176183	0.0233919	0	100	4	NA
Amaraji	Pernambuco	234.822	22555	0.249666	0	0	100	4	NA
Amargosa	Bahia	435.956	37081	0.039783	0	0	100	4	NA
Anadia	Alagoas	189.453	17989	0.0400525	0	0	100	4	NA
Apuarema	Bahia	150.672	7795	0.102591	0	0	100	4	NA
Araponga	Minas Gerais	304.461	8454	0.199456	0.188792	0	100	4	NA
Araruama	Rio de Janerio	633.619	118964	0.093746	0.0100123	0	100	4	NA
Aratuípe	Bahia	177.062	9146	0.157391	0	0	100	4	NA
Areal	Rio de Janerio	111.447	11785	0.0965056	0	0	100	4	NA
Areia Branca	Sergipe	128.399	17825	0.130636	0.45499	0	100	4	NA
Areias	São Paulo	306.458	3839	0.122078	0.0863548	0	100	4	NA
Armação dos Búzios	Rio de Janerio	69.5228	29790	0.330954	0.177214	0	100	4	NA
Arraial do Cabo	Rio de Janerio	152.604	28627	0.127914	0.192344	0	100	4	NA
Aurelino Leal	Bahia	446.28	13525	0.0202866	0	0	100	4	NA
Baependi	Minas Gerais	751.744	19045	0.10984	0.133605	0	100	4	NA
Barra do Rocha	Bahia	192.483	6261	0.0304531	0	0	100	4	NA
Biritiba-Mirim	São Paulo	316.666	30492	0.330671	0.191243	0	100	4	NA
Brasópolis	Minas Gerais	361.154	14982	0.0757782	0	0	100	4	NA
BrejõEs	Bahia	481.221	14866	0.0151677	0	0	100	4	NA
Cabo Frio	Rio de Janerio	400.444	200380	0.149541	0.0323777	0	100	4	NA
Cachoeira	Bahia	398.491	34244	0.196445	0	0	100	4	NA
Cajueiro	Alagoas	124.375	21480	0.0554212	0	0	100	4	NA
Camaçari	Bahia	759.827	275575	0.153545	0.00104511	0	100	4	NA
Camamu	Bahia	885.171	37207	0.257094	0	0	100	4	NA
Camanducaia	Minas Gerais	527.688	21844	0.0947709	0	0	100	4	NA
Campestre	Alagoas	53.9899	6925	0.0183829	0	0	100	4	NA
Campo Alegre	Santa Catarina	496.18	11972	0.178734	0	0	100	4	NA
Campos do Jordão	São Paulo	289.448	50221	0.197755	0.296388	0	100	4	NA
Canela	Rio Grande do Sul	254.575	41682	0.293355	0	0	100	4	NA
Cantagalo	Paraná	583.467	13396	0.111426	0	0	100	4	NA
Caparaó	Minas Gerais	129.962	5416	0.170646	0.00681518	0	100	4	NA
Capela	Sergipe	440.673	32666	0.0889448	0.0203004	0	100	4	NA
Carlos Barbosa	Rio Grande do Sul	229.912	26976	0.183386	0	0	100	4	NA
Carmo de Minas	Minas Gerais	323.332	14451	0.0748342	0	0	100	4	NA
Castelo	Espiríto Santo	669.083	37331	0.177207	0.0114052	0	100	4	NA
Castro	Paraná	2531.36	70086	0.13419	0.0225975	0	100	4	NA
Castro Alves	Bahia	762.961	27097	0.043282	0	0	100	4	NA
Catanduvas	Paraná	581.594	10467	0.1012	0	0	100	4	NA
Catu	Bahia	435.093	55021	0.0493729	0.000838895	0	100	4	NA
Caxambu	Minas Gerais	100.261	22257	0.129442	0	0	100	4	NA
Caxias do Sul	Rio Grande do Sul	1643.97	465304	0.230358	0	0	100	4	NA
Colônia Leopoldina	Alagoas	287.306	21307	0.212949	0	0	100	4	NA
Conceição do Almeida	Bahia	281.884	18644	0.0215096	0	0	100	4	NA
Conceição do Rio Verde	Minas Gerais	370.014	13499	0.0740148	0	0	100	4	NA
Córrego do Bom Jesus	Minas Gerais	123.276	3819	0.0259937	0	0	100	4	NA
Cortês	Pernambuco	101.284	12647	0.246373	0	0	100	4	NA
Cristina	Minas Gerais	312.103	10486	0.0900487	0	0	100	4	NA
Cruzeiro	São Paulo	304.532	80408	0.257976	0.00086105	0	100	4	NA
Cubatão	São Paulo	142.245	125178	0.69243	0.437504	0	100	4	NA
Delfim Moreira	Minas Gerais	408.147	8197	0.260319	0.000573328	0	100	4	NA
Diamante do Sul	Paraná	360.044	3583	0.0550658	0	0	100	4	NA
Divino de São Lourenço	Espiríto Santo	175.678	4688	0.236686	0.224482	0	100	4	NA
Dom Macedo Costa	Bahia	93.1809	4127	0.00488379	0	0	100	4	NA
Dom Viçoso	Minas Gerais	113.11	3074	0.113	0	0	100	4	NA
Dores do Rio Preto	Espiríto Santo	153.034	6827	0.175671	0.149687	0	100	4	NA
Elísio Medrado	Bahia	199.599	8426	0.0763279	0	0	100	4	NA
Espera Feliz	Minas Gerais	325.136	24098	0.127974	0.0492516	0	100	4	NA
Estância	Sergipe	642.483	67491	0.145472	0	0	100	4	NA
Extrema	Minas Gerais	243.062	31693	0.103572	0	0	100	4	NA
Farroupilha	Rio Grande do Sul	361.667	67465	0.174198	0	0	100	4	NA
Flores da Cunha	Rio Grande do Sul	272.649	28739	0.236737	0	0	100	4	NA
Gandu	Bahia	229.022	32814	0.0451395	0	0	100	4	NA
Garopaba	Santa Catarina	114.717	20024	0.29234	0	0	100	4	NA
Goioxim	Paraná	702.48	7590	0.0740618	0	0	100	4	NA
Gonçalves	Minas Gerais	187.532	4370	0.128717	4.81831e-05	0	100	4	NA
Gongogi	Bahia	198.279	8325	0.0240487	0	0	100	4	NA
Gramado	Rio Grande do Sul	236.984	34110	0.242856	0	0	100	4	NA
Guaraniaçu	Paraná	1225.5	14372	0.103412	0	0	100	4	NA
Guarapuava	Paraná	3114.93	175779	0.155176	0	0	100	4	NA
Ibateguara	Alagoas	261.292	15762	0.22585	0	0	100	4	NA
Ibema	Paraná	145.443	6306	0.0842348	0	0	100	4	NA
Ibirapitanga	Bahia	470.308	24059	0.101004	0	0	100	4	NA
Ibirataia	Bahia	226.038	18546	0.126858	0	0	100	4	NA
Ibitirama	Espiríto Santo	329.402	9400	0.183865	0.332258	0	100	4	NA
Igaratá	São Paulo	293.514	9251	0.157685	0.000163349	0	100	4	NA
Igrapiúna	Bahia	512.839	13636	0.213762	0	0	100	4	NA
Igrejinha	Rio Grande do Sul	136.794	33711	0.28156	0	0	100	4	NA
Iguaba Grande	Rio de Janerio	51.4987	24788	0.175198	0	0	100	4	NA
Ipiaú	Bahia	286.701	47178	0.0644313	0	0	100	4	NA
Irati	Paraná	999.611	58957	0.129018	1.41372e-06	0	100	4	NA
Itabaiana	Sergipe	336.644	91873	0.0321731	0.0447207	0	100	4	NA
Itacaré	Bahia	730.449	26753	0.315433	0.0583477	0	100	4	NA
Itajubá	Minas Gerais	290.498	94940	0.128688	0	0	100	4	NA
Itajuípe	Bahia	295.869	21884	0.0127618	0	0	100	4	NA
Itamari	Bahia	131.541	8259	0.0597993	0	0	100	4	NA
Itamonte	Minas Gerais	430.641	14855	0.371229	0.427139	0	100	4	NA
Itanhaém	São Paulo	599.185	93696	0.837687	0.401746	0	100	4	NA
Itanhandu	Minas Gerais	143.907	14902	0.206592	0	0	100	4	NA
Itapitanga	Bahia	410.486	10799	0.0666818	0	0	100	4	NA
Ituberá	Bahia	417.6	28639	0.300893	0	0	100	4	NA
Iúna	Espiríto Santo	460.522	29258	0.0892098	0.171048	0	100	4	NA
Joanópolis	São Paulo	374.45	12492	0.124158	0	0	100	4	NA
Joaquim Nabuco	Pernambuco	121.945	16056	0.352771	0	0	100	4	NA
Jumirim	São Paulo	56.5924	3042	0.0395948	0	0	100	4	NA
Jundiá	Alagoas	119.689	4275	0.0429241	0	0	100	4	NA
Laje	Bahia	498.107	24207	0.0675122	0	0	100	4	NA
Laranjal Paulista	São Paulo	386.779	26853	0.0304174	0	0	100	4	NA
Maraial	Pernambuco	196.199	12009	0.210209	0	0	100	4	NA
Maraú	Bahia	774.562	21016	0.254822	0	0	100	4	NA
Maria da Fé	Minas Gerais	203.822	14551	0.0915259	0	0	100	4	NA
Maribondo	Alagoas	171.104	13807	0.0269666	0	0	100	4	NA
Maricá	Rio de Janerio	362.415	139552	0.334208	0	0	100	4	NA
Matinhos	Paraná	117.117	31690	0.854275	0.270357	0	100	4	NA
Miguel Pereira	Rio de Janerio	287.407	24815	0.332027	0.0253235	0	100	4	NA
Moji das Cruzes	São Paulo	714.074	414907	0.278873	0.00628711	0	100	4	NA
Mombuca	São Paulo	133.216	3411	0.0730624	0	0	100	4	NA
Mongaguá	São Paulo	143.179	50641	0.887267	0.324215	0	100	4	NA
Morro Reuter	Rio Grande do Sul	88.0709	6008	0.299734	0	0	100	4	NA
Mutuípe	Bahia	273.431	22928	0.0518748	0	0	100	4	NA
Niterói	Rio de Janerio	129.457	494200	0.635106	0	0	100	4	NA
Nova Friburgo	Rio de Janerio	932.487	184122	0.440166	0.00379541	0	100	4	NA
Nova Ibiá	Bahia	180.793	6913	0.135114	0	0	100	4	NA
Nova Iguaçu	Rio de Janerio	524.506	804815	0.588983	0.308641	0	100	4	NA
Nova Petrópolis	Rio Grande do Sul	291.132	20126	0.369672	0	0	100	4	NA
Novo Lino	Alagoas	182.317	12479	0.134384	0	0	100	4	NA
Olímpio Noronha	Minas Gerais	53.8804	2677	0.0724663	0	0	100	4	NA
Osório	Rio Grande do Sul	663.277	43256	0.0667152	0	0	100	4	NA
Otacílio Costa	Santa Catarina	846.489	17349	0.0754496	0	0	100	4	NA
Palhoça	Santa Catarina	394.784	150623	0.566332	0.390472	0	100	4	NA
Palmares	Pernambuco	336.858	61731	0.18097	0	0	100	4	NA
Paraíso	São Paulo	154.489	6207	0.038712	0	0	100	4	NA
Paraisópolis	Minas Gerais	331.545	20410	0.0660499	0	0	100	4	NA
Passa Quatro	Minas Gerais	276.59	16224	0.219668	0	0	100	4	NA
Paudalho	Pernambuco	277.639	54051	0.200584	0	0	100	4	NA
Pereiras	São Paulo	222.115	8006	0.0189506	0	0	100	4	NA
Peruíbe	São Paulo	324.678	63815	0.779753	0.418	0	100	4	NA
Petrópolis	Rio de Janerio	774.689	297888	0.354174	0.161261	0	100	4	NA
Picada Café	Rio Grande do Sul	85.0912	5462	0.360821	0	0	100	4	NA
Pindamonhangaba	São Paulo	730.125	157062	0.216714	0.00876978	0	100	4	NA
Piquete	São Paulo	175.774	14278	0.331933	0	0	100	4	NA
Piraí do Norte	Bahia	227.562	10415	0.0753773	0.000686538	0	100	4	NA
Piranguçu	Minas Gerais	206.445	5432	0.146167	0	0	100	4	NA
Pojuca	Bahia	288.514	36551	0.0531179	0	0	100	4	NA
Pontal do Paraná	Paraná	200.72	23261	0.823371	9.81809e-05	0	100	4	NA
Pouso Alto	Minas Gerais	261.119	6291	0.0952877	0.0437884	0	100	4	NA
Praia Grande	São Paulo	149.312	287967	0.864451	0.350618	0	100	4	NA
Presidente Tancredo Neves	Bahia	414.974	26238	0.0997938	0	0	100	4	NA
Primavera	Pernambuco	109.889	14200	0.179742	0	0	100	4	NA
Queluz	São Paulo	249.472	12234	0.136405	0	0	100	4	NA
Quipapá	Pernambuco	230.608	25220	0.104263	0	0	100	4	NA
Rafard	São Paulo	132.302	8952	0.0536407	0	0	100	4	NA
Ribeirão Pires	São Paulo	99.1081	118871	0.423371	0	0	100	4	NA
Rio Azul	Paraná	629.879	14809	0.200484	0	0	100	4	NA
Rio Grande da Serra	São Paulo	36.7102	47142	0.579333	0	0	100	4	NA
Rolante	Rio Grande do Sul	297.075	20479	0.176105	0	0	100	4	NA
Roseira	São Paulo	130.239	10168	0.127197	0	0	100	4	NA
Santa Inês	Bahia	356.218	10884	0.157062	0	0	100	4	NA
Santa Maria do Herval	Rio Grande do Sul	139.197	6295	0.13485	0	0	100	4	NA
Santa Maria do Oeste	Paraná	847.085	11315	0.071353	0	0	100	4	NA
Santo Amaro	Bahia	518.415	61407	0.226602	0.00780184	0	100	4	NA
Santo André	São Paulo	174.781	704942	0.761765	0.0336128	0	100	4	NA
Santo Antônio de Jesus	Bahia	259.178	99407	0.0583038	0	0	100	4	NA
Santo Antônio do Pinhal	São Paulo	132.749	6733	0.238088	0	0	100	4	NA
Santos	São Paulo	280.576	433153	0.751412	0.410782	0	100	4	NA
São Benedito do Sul	Pernambuco	156.782	14900	0.191656	0	0	100	4	NA
São Bento do Sapucaí	São Paulo	252.19	10831	0.17956	0.124906	0	100	4	NA
São Bernardo do Campo	São Paulo	406.189	805895	0.604127	0.304734	0	100	4	NA
São Gonçalo	Rio de Janerio	248.029	1025507	0.530753	5.93477e-05	0	100	4	NA
São José da Laje	Alagoas	264.761	23847	0.172814	0	0	100	4	NA
São José do Vale do Rio Preto	Rio de Janerio	239.965	20704	0.214097	0.0043023	0	100	4	NA
São José dos Campos	São Paulo	1099.84	673255	0.173607	0	0	100	4	NA
São Lourenço	Minas Gerais	57.0436	44037	0.15728	0	0	100	4	NA
São Marcos	Rio Grande do Sul	256.298	21024	0.25725	0	0	100	4	NA
São Miguel das Matas	Bahia	207.442	11105	0.0386046	0	0	100	4	NA
São Pedro da Aldeia	Rio de Janerio	341.641	93659	0.1076	0.0248226	0	100	4	NA
São Sebastião do Passé	Bahia	549.189	45090	0.0927988	0.00213427	0	100	4	NA
São Sebastião do Rio Verde	Minas Gerais	91.9032	2206	0.103998	0	0	100	4	NA
São Vicente	São Paulo	148.284	350465	0.738942	0.472377	0	100	4	NA
Sapucaí-Mirim	Minas Gerais	284.899	6616	0.182	0	0	100	4	NA
Sericita	Minas Gerais	166.724	7375	0.104654	0.0379949	0	100	4	NA
Silveiras	São Paulo	414.679	6083	0.0621576	0	0	100	4	NA
Soledade de Minas	Minas Gerais	196.861	5971	0.0632096	0	0	100	4	NA
Sumidouro	Rio de Janerio	395.161	15070	0.184115	0	0	100	4	NA
Taperoá	Bahia	408.54	20474	0.238974	0	0	100	4	NA
Taquara	Rio Grande do Sul	457.136	56896	0.113467	0	0	100	4	NA
Taubaté	São Paulo	625.965	296431	0.127395	0	0	100	4	NA
Tavares	Rio Grande do Sul	604.245	5539	0.017011	0.327056	0	100	4	NA
Teolândia	Bahia	288.286	15016	0.143033	0	0	100	4	NA
Teotônio Vilela	Alagoas	297.773	43605	0.0803789	0	0	100	4	NA
Terra Nova	Bahia	198.765	13526	0.0465284	0	0	100	4	NA
Tietê	São Paulo	392.859	39324	0.0524435	0	0	100	4	NA
Trajano de Morais	Rio de Janerio	589.517	10347	0.24362	5.92323e-05	0	100	4	NA
Tremembé	São Paulo	192.505	43871	0.136271	0	0	100	4	NA
Três CoraçõEs	Minas Gerais	825.764	76734	0.0567902	0	0	100	4	NA
Três Coroas	Rio Grande do Sul	185.555	25535	0.308898	0	0	100	4	NA
Treze Tílias	Santa Catarina	185.175	6925	0.100703	0	0	100	4	NA
Turuçu	Rio Grande do Sul	254.919	3608	0.0501561	0	0	100	4	NA
Ubaitaba	Bahia	221.757	21183	0.0201989	0	0	100	4	NA
Ubatã	Bahia	332.986	27312	0.0928041	0	0	100	4	NA
União dos Palmares	Alagoas	427.624	65495	0.123024	0	0	100	4	NA
Vale Real	Rio Grande do Sul	44.2177	5447	0.303462	0	0	100	4	NA
Valença	Bahia	1190.35	96287	0.242141	0	0	100	4	NA
Varzedo	Bahia	166.933	9449	0.113276	0	0	100	4	NA
Viçosa	Alagoas	354.758	26289	0.050429	0	0	100	4	NA
Virgínia	Minas Gerais	326.438	8864	0.0731237	0	0	100	4	NA
Vitória de Santo Antão	Pernambuco	371.646	133907	0.120729	0	0	100	4	NA
Wenceslau Braz	Minas Gerais	101.886	2619	0.0868467	0	0	100	4	NA
Xexéu	Pernambuco	110.865	14513	0.146981	0	0	100	4	NA
Tangará	Santa Catarina	389.246	8777	0.121034	0	0	100	4	NA

## Sheet: References
SOS Mata Atlântica and INPE (2012) Atlas dos remanescentes florestais da Mata Atlântica - Período de 2011. Fundação SOS Mata Atlântica, São Paulo, Brasil. Available at mapas.sosma.org.br.
